# Supplementary material
Source: PubMed Central journal article supplement (PMC3581083)
Supplement: NIHMS429466-supplement-1.pdf [file NIHMS429466-supplement-1.pdf]

**Transcriptional Reprogramming of Mature CD4<sup>+</sup> T helper Cells  
generates distinct MHC class II-restricted Cytotoxic T Lymphocytes**

Daniel Mucida<sup>1,2,14</sup>, Mohammad Mushtaq Husain<sup>1,14</sup>, Sawako Muroi<sup>3,14</sup>, Femke van Wijk<sup>1,4,14</sup>, Ryo Shinnakasu<sup>1,5</sup>, Yoshinori Naoe<sup>3</sup>, Bernardo Sgarbi Reis<sup>2</sup>, Yujun Huang<sup>1</sup>, Florence Lambomez<sup>1</sup>, Michael Docherty<sup>1,6</sup>, Antoine Attinger<sup>1,7</sup>, Jr-Wen Shui<sup>1</sup>, Gisen Kim<sup>1</sup>, Christopher J. Lena<sup>1</sup>, Shinya Sakaguchi<sup>8</sup>, Chizuko Miyamoto<sup>3</sup>, Peng Wang<sup>9,10</sup>, Koji Atarashi<sup>11</sup>, Yunji Park<sup>1,12</sup>, Toshinori Nakayama<sup>13</sup>, Kenya Honda<sup>11</sup>, Wilfried Ellmeier<sup>8</sup>, Mitchell Kronenberg<sup>1</sup>, Ichiro Taniuchi<sup>3\*</sup> & Hilde Cheroutre<sup>1\*</sup>

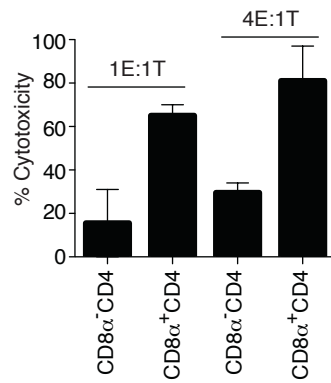

**Supplementary Figure 1.** CD4 CTLs are cytotoxic. % cytotoxicity (anti-TCR $\beta$  redirected killing of P815 target cells) of respective lymphocyte subsets as measured by LDH release assay. Target killing was done in two effectors (E) to targets (T) ratios, two times each. Each bar shows standard error of the mean (SEM; n=2).

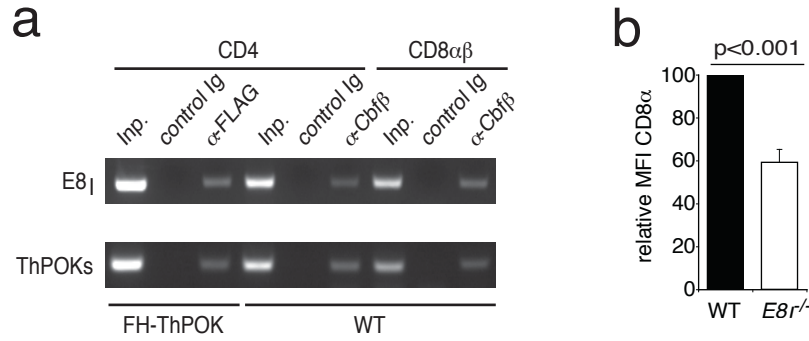

**Supplementary Figure 2.** ThPOK binds to E8<sub>I</sub> and prevents CD8α expression in mature CD4 T cells. **(a)** Chromatin immunoprecipitation (ChIP) assay using CD4 T cells from FLAG-hemagglutinin epitope-tagged ThPOK protein (FH-ThPOK) knock-in mice and WT mice. *Thpok* silencer locus was used for positive control for ThPOK binding (anti-FLAG antibodies) and wild type CD8 T cells were used as positive control for the Cbfb binding. **(b)** ThPOK-negative CD4 effector cells lost ThPOK as mature cells in the periphery. Relative MFI of CD8α expression on CD45<sup>+</sup>TCRβ<sup>+</sup>CD4<sup>+</sup> sIELs from *Rag1*<sup>-/-</sup> recipient mice, 6-8 weeks after adoptive transfer of sorted TCRβ<sup>+</sup>CD8α<sup>-</sup>CD45RB<sup>high</sup>CD25<sup>-</sup>CD4<sup>+</sup> spleen T cells from naïve WT or E8<sub>I</sub><sup>-/-</sup> donor mice. Data are representative of 4 independent experiments, n = 4 or 5 mice.

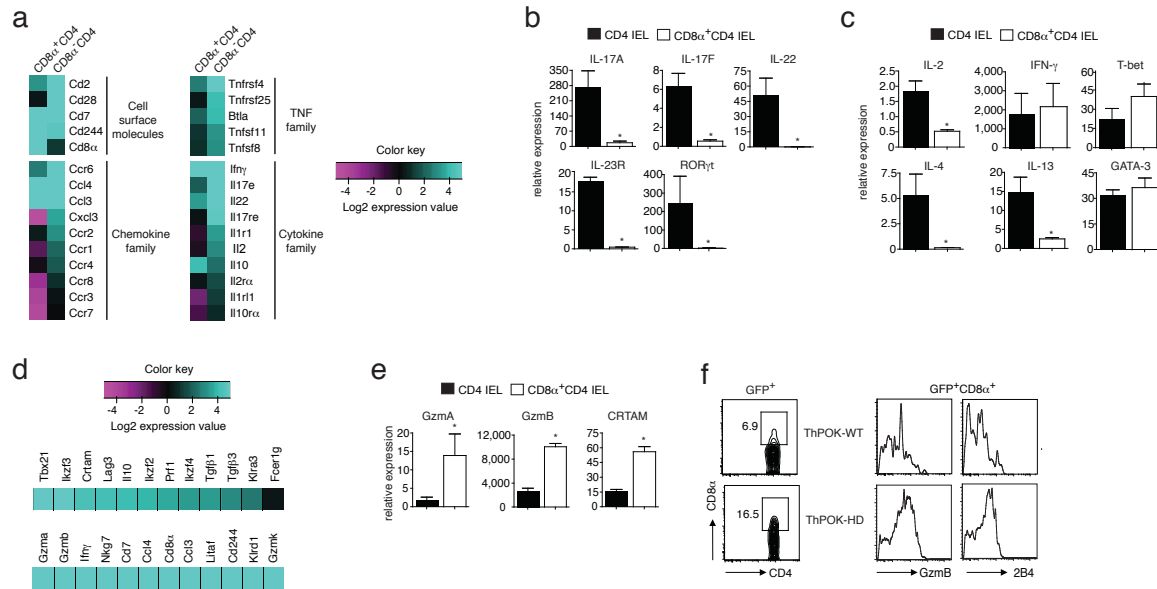

**Supplementary Figure 3.** Activated CD4 T<sub>H</sub> cells that lose ThPOK expression differentiate to CTL. **(a)** Log<sub>2</sub> transformed normalized signal intensity heatmap for selected genes related to CD4 T<sub>H</sub> gene expression profiles (rows) expressed in sorted TCR $\beta$ <sup>+</sup>CD4<sup>+</sup> and TCR $\beta$ <sup>+</sup>CD8 $\alpha$ <sup>+</sup>CD4<sup>+</sup> IELs (columns) isolated from *Rag1*<sup>-/-</sup> recipient mice that previously received sorted naïve TCR $\beta$ <sup>+</sup>CD8 $\alpha$ <sup>-</sup>CD45RB<sup>high</sup>CD25<sup>-</sup>CD4<sup>+</sup> spleen T cells from wild type B6 donor mice. **(b)** Relative mRNA levels of T<sub>H</sub>17-associated genes in IELs as in **(a)**. Values are from individual mice and without further activation and expressed relative to L32 as an internal standard. Representative data (as mean  $\pm$  SEM) are shown for one of at least three independent experiments. **(c)** Relative mRNA levels of T<sub>H</sub>1 and T<sub>H</sub>2 associated genes as in **(a)**. Representative data (as mean  $\pm$  SEM) are shown for one of at least three independent experiments. **(d)** Heat map of normalized gene expression as in **(a)** for selected genes enriched in the TCR $\beta$ <sup>+</sup>CD8 $\alpha$ <sup>+</sup>CD4<sup>+</sup> subset are shown. **(e)** Relative mRNA expression of *Granzyme A* and *B* and *crtam* as in **(a)**. Pooled data of five mice are shown from one of three independent experiments. \*  $P < 0.05$  (unpaired, two-tailed Student *t* test). **(f)** Staining for CD4 and CD8 $\alpha$  (left panels) or Granzyme B or 2B4 (right panels) of gated TCR $\beta$ <sup>+</sup>CD4<sup>+</sup>

GFP<sup>+</sup> sIELs isolated from *Rag1*<sup>-/-</sup> recipients 4-5 weeks after adoptive transfer of ThPOK-*gfp* or ThPOK-HD mutant-*gfp*-transfected TCRβ<sup>+</sup>CD4 primary cells. Data are representative of 3 independent experiments, n = 3 mice.

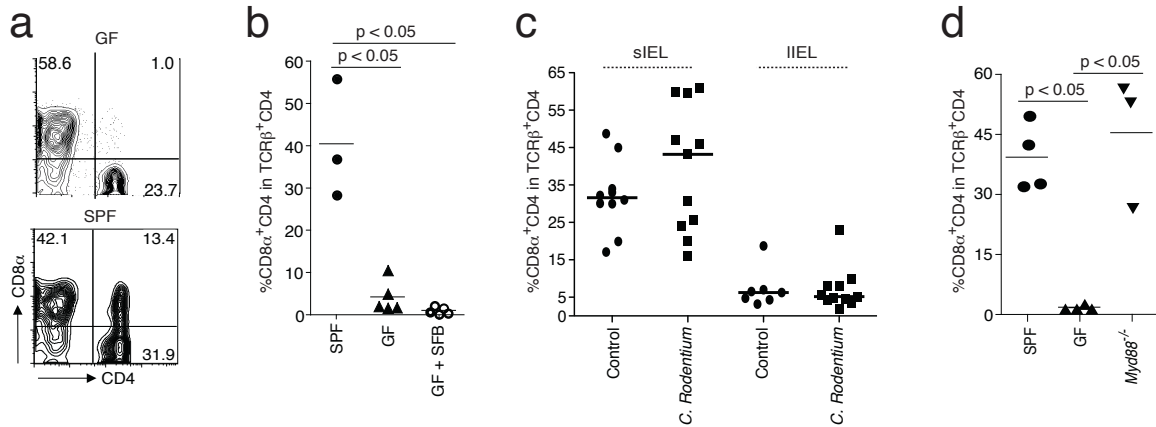

**Supplementary Figure 4.** The ThPOK loss and reprogramming of CD4 CTL is an antigen-driven process *in vivo*. **(a)** Staining for CD8 $\alpha$  expression on CD45<sup>+</sup>TCR $\beta$ <sup>+</sup> IELs of GF (upper panel) or SPF (lower panel) B6 mice. Data are representative of 2 independent experiments, n = 4 or 5. **(b)** Frequency of CD8 $\alpha$ <sup>+</sup>CD4<sup>+</sup> T cells in gated CD45<sup>+</sup>TCR $\beta$ <sup>+</sup>CD8 $\beta$ <sup>-</sup>CD4<sup>+</sup> lymphocytes from Swiss-Webster SPF, GF mice or GF mice reconstituted for 4 weeks with SFB. Data are representative of 2 independent experiments, n = 4 or 5. ANOVA and Bonferroni as post-test were used for statistics. **(c)** Frequency of CD8 $\alpha$ <sup>+</sup>CD4<sup>+</sup> T cells in gated CD45<sup>+</sup>TCR $\beta$ <sup>+</sup>CD4<sup>+</sup> sIELs and IIELs of ThPOK-*gfp* mice 14 days post *C. rodentium* infection. Data are representative of 2 independent experiments, n = 3 or 4 mice. **(d)** Frequency of CD8 $\alpha$ <sup>+</sup>CD4<sup>+</sup> cells as in **(b)** from conventionally raised specific-pathogen-free (SPF) or germ-free (GF) or *Myd88*<sup>-/-</sup> C57Bl6 mice. Data are representative of 2 independent experiments, n = 4 or 5 mice. ANOVA and Bonferroni as post-test were used for statistics.

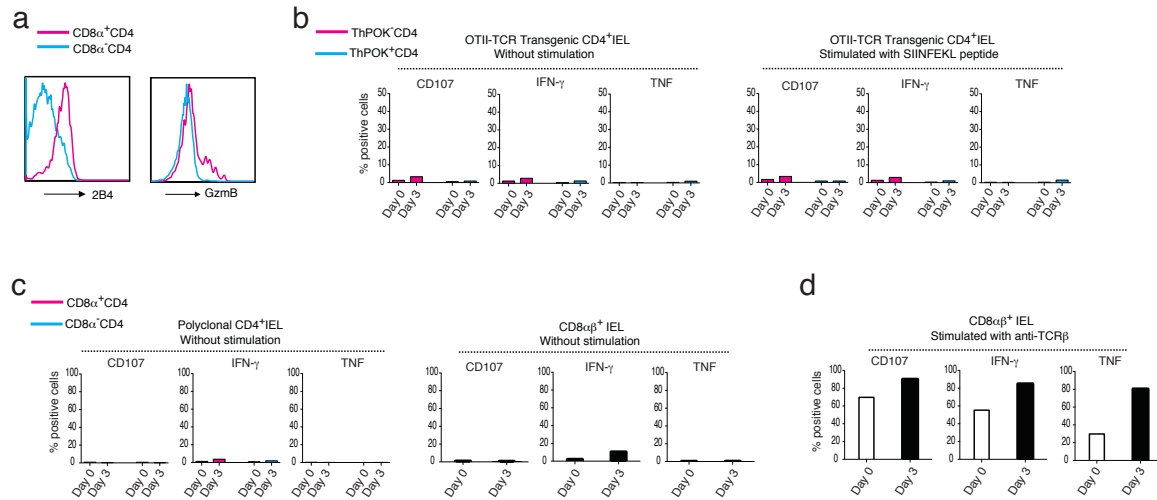

**Supplementary Figure 5.** CD4 CTL function as potent antigen-specific and IL-15-sensitive effector cells. **(a)** 2B4 and Granzyme B expression on OT-II TCR transgenic CD8 $\alpha^-$ CD4<sup>+</sup> and CD8 $\alpha^+$ CD4<sup>+</sup> sIELs isolated from *Rag1*<sup>-/-</sup> recipient mice after 4 weeks of OVA-diet feeding. Data representative of 2 independent experiments. **(b)** Frequency of CD107, IFN $\gamma$  and TNF $\alpha$  positive cells among unstimulated (left panels) or SIINFEKL stimulated (right panels) ThPOK<sup>-</sup> (red) and ThPOK<sup>+</sup> (blue) gated TCR $\beta^+$ CD4<sup>+</sup> OT-II TCR transgenic sIELs isolated from *Rag1*<sup>-/-</sup> recipient mice after 4 weeks of OVA-diet feeding and analyzed at day 0 without- or after 3 days culturing with rIL-15. **(c)** Frequency of CD107, IFN $\gamma$  and TNF $\alpha$  positive cells among unstimulated gated CD4<sup>+</sup>CD45<sup>+</sup>TCR $\alpha\beta^+$ - or CD8 $\alpha^+$ CD45<sup>+</sup>TCR $\beta^+$  polyclonal sIELs analyzed at day 0 (open bars) or after culturing in rIL-15 (solid bars). **(d)** Frequency of CD107, IFN $\gamma$  and TNF positive cells among gated CD8 $\alpha^+$ CD45<sup>+</sup>TCR $\beta^+$  polyclonal sIELs analyzed at day 0 (open bars) or after culturing in rIL-15 (solid bars) prior to anti-TCR $\beta$  stimulation *in vitro*. Data are representative of 3 independent experiments.
